# Supplementary material for: Hidden microalgae diversity in reef systems: reanalysis of coral microbiomes reveals spatial patterns of coral-associated plastid communities in the Southwestern Atlantic Ocean (SWAO)
Source: PeerJ. 2025 Nov 3;13:e20116. doi: 10.7717/peerj.20116 (PMC12591052; doi:10.7717/peerj.20116)
Supplement: Supplemental Information 6 [file peerj-13-20116-s006.xlsx]

## Sheet: Table_S17
Fasta_ID	Colpodellid ESVs	query acc.ver	subject acc.ver	% identity	alignment length	mismatches	gap opens	q. start	q. end	s. start	s. end	evalue	bit score
5fb6ebd4a099428c9f3b25776c6249da	GCGCAAGCCTGACAGAGCGGCGTCATGTGAAGGAAGAAGGCTTGAAATAGGTTGTAAACTTCTTTTACTGAGTAATGAATACTGACAACGCAGTAAAAAAGTATCGGCTAACTCCGTGCCAGCAGCCGCGGTAATACGGGGGATGCAAGCGTTATCCGGAATCACTGGGCGTAAAGCGTCTGTAGGTGGTTTAGTGTGTTCTTAGTTAAATTATGAAGCCTAACTTCATGAAAAGTAAGAAAACTATTAGACTTGAGTACGATAGGGGTAAGAGGAATTCTTCGAGAAGTAGTGAAATGCGAAGATACGAAGGAGAAGATCATAAGCGAAGGCTTCTTACTGGGTCGTAACTGACACTGAGAGACGA	5fb6ebd4a099428c9f3b25776c6249da	MH304845.1	99183	367	3	0	1	367	1403	1037	0.0	662
		5fb6ebd4a099428c9f3b25776c6249da	MH304845.1	99183	367	3	0	1	367	44605	44971	0.0	662
6b9bd2e383ec0d3bb1d3c28de063983e	GCGCAAGCCTGACAGAGCGGCGTCATGTGAAGGAAGAAGGCCTGAAATAGGTTGTAAACTTCTTTTACTGAGTAATGAATACTGACAACGCAGTAAAAAAGTATCGGCTAACTCCGTGCCAGCAGCCGCGGTAATACGGGGGATGCAAGCGTTATCCGGAATCACTGGGCGTAAAGCGTCTGTAGGTGGTTTAGTGTGTTCTTAGTTAAATTATGAAGCCTAACTTCATGAAAAGTAAGAAAACTATTAGACTTGAGTACGATAGGGGTAAGAGGAATTCTTCGAGAAGTAGTGAAATGCGAAGATACGAAGGAGAAGATCATAAGCGAAGGCTTCTTACTGGGTCGTAACTGACACTGAGAGACGA	6b9bd2e383ec0d3bb1d3c28de063983e	MH304845.1	99455	367	2	0	1	367	1403	1037	0.0	667
		6b9bd2e383ec0d3bb1d3c28de063983e	MH304845.1	99455	367	2	0	1	367	44605	44971	0.0	667
922294a1126a691de7dc887be2ef66c8	GCGCAAGCCTGACAGAGCGGCGTCATGTGAAGGAAGAAGGCCTGAAATAGGTTGTAAACTTCTTTTACTGAGTAATGAATACTGACAACGCAGTAAAAAAGTATCGGCTAACTCCGTGCCAGCAGCCGCGGTAATACGGGGGATGCAAGCGTTATCCGGAATCACTGGGCGTAAAGCGTCTGTAGGTGGTTTAGTGTGTTCTTAGTTAAATTATGAAGCCTAACTTCATGAAAAGTAAGAAAACTATTAGACTTGAGTACGATAGGGGTAAGAGGAATTCTTCGAGAAGTAGTGAAATGCGAAGATACGAAGGAGAAGATCATAAGCGAAGGCTTCTTACTGGGTCGTAACTGACACTGAGAGACGAAAGCTAGGGGAGCGAAT	922294a1126a691de7dc887be2ef66c8	MH304845.1	99479	384	2	0	1	384	1403	1020	0.0	699
		922294a1126a691de7dc887be2ef66c8	MH304845.1	99479	384	2	0	1	384	44605	44988	0.0	699
0968f38049e9ee4b4f2959de48b50b65	GCGCAAGCCTGACAGAGCGGCGTCATGTGAAGGAAGAAGGCCTGAAATAGGTTGTAAACTTCTTTTACTGAGTAATGAATACTGACAACGCAGTAAAAAAGTATCGGCTAACTCCGTGCCAGCAGCCGCGGTAATACGGGGGATGCAAGCGTTATCCGGAATCACTGGGCGTAAAGCGTCTGTAGGTGGTTTAGTGTGTTCTTAGTTAAATTATGAAGCCTAACTTCATGAAAAGTAAGAAAACTATTAGACTTGAGTACGATAGGGGCAAGAGGAATTCTTCGAGAAGTAGTGAAATGCGAAGATACGAAGGAGAAGATCATAAGCGAAGGCTTCTTACTGGGTCGTAACTGACACTGAGAGACGA	0968f38049e9ee4b4f2959de48b50b65	MH304845.1	99183	367	3	0	1	367	1403	1037	0.0	662
		0968f38049e9ee4b4f2959de48b50b65	MH304845.1	99183	367	3	0	1	367	44605	44971	0.0	662
a105344415ca093bf44c5ea55bf1fe70	GCGCAAGCCTGACAGAGCGGCGTCATGTGAAGGAAGAAGGCCTGAAATAGGTTGTAAACTTCTTTTACTGAGTAATGAATACTGACAACGCAGTAAAAAAGTATCGGCTAACTCCGTGCCAGCAGCCGCGGTAATACGGGGGATGCAAGCGTTATCCGGAATCACTGGGCGTAAAGCGTCTGTAGG]TGGTTTAGTGTGTTCTTAGTTAAATTATGAAGCCTAACTTCATGAAAAGTAAGAAAACTATTAGACTTGAGTACGATAGGGGTAAGAGGAATTCTTCGAGAAGCAGTGAAATGCGAAGATACGAAGGAGAAGATCATAAGCGAAGGCTTCTTACTGGGTCGTAACTGACACTGAGAGACGAAAGCTAGGGGAGCGAAT	a105344415ca093bf44c5ea55bf1fe70	MH304845.1	99219	384	3	0	1	384	1403	1020	0.0	693
		a105344415ca093bf44c5ea55bf1fe70	MH304845.1	99219	384	3	0	1	384	44605	44988	0.0	693
19164ea3a955e7d103b8162b255cea98	GCGCAAGCCTGACAGAGCGGCGTCGTGTGAAGGAAGAAGGCCTGAAATAGGTTGTAAACTTCTTTTACTGAGTAATGAATAATGACAACGCAGTAAAAAAGTATCGGCTAACTCCGTGCCAGCAGCCGCGGTAATACGGGGGATGCAAGCGTTATCCGGAATCACTGGGCGTAAAGCGTCTGTAGGTGGTTTAGTGTGTTCTTAGTTAAATTATGAAGCCTAACTTCATGAAAAGTAAGAAAACTATTAGACTTGAGTACGATAGGGGTAAGAGGAATTCTTCGAGAAGTAGTGAAATGCGAAGATACGAAGGAGAAGATCATAAGCGAAGGCTTCTTACTGGGTCGTAACTGACACTGAGAGACGA	19164ea3a955e7d103b8162b255cea98	MH304845.1	100000	367	0	0	1	367	1403	1037	0.0	678
		19164ea3a955e7d103b8162b255cea98	MH304845.1	100000	367	0	0	1	367	44605	44971	0.0	678
61f1852961e7685c4507352f73b363c7	CAAGCGTTATCCGGAATCACTGGGCGTAAAGCGTCTGTAGGTGGTTTAGTGTGTTCTTAGTTAAATTATGAAGCCTAACTTCATGAAAAGTAAGAAAACTATTAGACTTGAGTACGATAGGGGTAAGAGGAATTCTTCGAGAAGTAGTGAAATGCGAAGATACGAAGGAGAAGATCATAAGCGAAGGCTTCTTACTGGGTCGTAACTGACACTGAGAGACGA	61f1852961e7685c4507352f73b363c7	MH304845.1	100000	222	0	0	1	222	1258	1037	5.88e-110	411
		61f1852961e7685c4507352f73b363c7	MH304845.1	100000	222	0	0	1	222	44750	44971	5.88e-110	411
60054894aad36bd2bdcd485e4a661091	GCGCAAGCCTGACAGAGCGGCGTCATGTGAAGGAAGAAGGCCTGAAATAGGTTGTAAACTTCTTTTACTGAGTAATGAATACTGACAACGCAGTAAAAAAGTATCGGCTAACTTCGTGCCAGCAGCCGCGGTAATACGGGGGATGCAAGCGTTATCCGGAATCACTGGGCGTAAAGCGTCTGTAGGTGGTTTAGTGTGTTCTTAGTTAAATTATGAAGCCTAACTTCATGAAAAGTAAGAAAACTATTAGACTTGAGTACGATAGGGGTAAGAGGAATTCTTCGAGAAGTAGTGAAATGCGAAGATACGAAGGAGAAGATCATAAGCGAAGGCTTCTTACTGGGTCGTAACTGACACTGAGAGACGA	60054894aad36bd2bdcd485e4a661091	MH304845.1	99183	367	3	0	1	367	1403	1037	0.0	662
		60054894aad36bd2bdcd485e4a661091	MH304845.1	99183	367	3	0	1	367	44605	44971	0.0	662
341e3d3a2a4a786c634e27a0ceb95b1c	GCGCAAGCCTGACAGAGCGGCGTCGTGTGAAGGAAGAAGGCCTGAAAGAGGTTGTAAACTTCTTTTACTGAGTAATGAATAATGACAACGCAGTAAAAAAGTATCGGCTAACTCCGTGCCAGCAGCCGCGGTAATACGGGGGATGCAAGCGTTATCCGGAATAACTGGGCGTAAAGCGTCTGTAGGTGGTTTAGTGTGTTCTTAGTTAAATTATGAAGCCTAACTTCATGAAAAGTAAGAAAACTATTAGACTTGAGTACGATAGGGGTAAGAGGAATTCTTCGAGAAGTAGTGAAATGCGAAGATACGAAGGAGAAGATCAGAAGCGAAGGCTTCTTACTGGGTCGTAACTGACACTGAGAGACGA	341e3d3a2a4a786c634e27a0ceb95b1c	MH304845.1	99183	367	3	0	1	367	1403	1037	0.0	662
		341e3d3a2a4a786c634e27a0ceb95b1c	MH304845.1	99183	367	3	0	1	367	44605	44971	0.0	662
